# Supplementary material for: The European Genome-phenome Archive in 2021
Source: Oxford University Press journal article supplement (doi:10.1093/nar/gkab1059), 2021-10-22
Supplement: gkab1059_supplemental_file.pdf [file gkab1059_supplemental_file.pdf]

# The European Genome-phenome Archive in 2021

## SUPPLEMENTARY MATERIALS

**Supplementary Table 1:** Overview of services that the EGA provides for researchers to submit, discover, and access data.

| Service         | Interfaces                                                                                                                                                                                                                                                                                                                                                                                                                                                                                                                                                                                                                                                                                                                                                      | Description                                                                                                                                          |
|-----------------|-----------------------------------------------------------------------------------------------------------------------------------------------------------------------------------------------------------------------------------------------------------------------------------------------------------------------------------------------------------------------------------------------------------------------------------------------------------------------------------------------------------------------------------------------------------------------------------------------------------------------------------------------------------------------------------------------------------------------------------------------------------------|------------------------------------------------------------------------------------------------------------------------------------------------------|
| Data submission | Submitter Portal<br>( <a href="https://ega-archive.org/submission/tools/submitter-portal">https://ega-archive.org/submission/tools/submitter-portal</a> )<br>Submitter API<br>( <a href="https://ega-archive.org/submission/programmatic-submissions">https://ega-archive.org/submission/programmatic-submissions</a> )<br>EGACryptor<br>( <a href="https://ega-archive.org/submission/tools/egacryptor">https://ega-archive.org/submission/tools/egacryptor</a> )<br>star2xml<br>( <a href="https://github.com/EbiEga/ega-metadata-schema/tree/main/Star2xml">https://github.com/EbiEga/ega-metadata-schema/tree/main/Star2xml</a> )                                                                                                                           | Preparing, encrypting, validating, and uploading data and metadata to EGA                                                                            |
| Data discovery  | EGA Website ( <a href="https://ega-archive.org/howtosearch">https://ega-archive.org/howtosearch</a> )<br>Metadata API<br>( <a href="https://ega-archive.org/metadata/how-to-use-the-api">https://ega-archive.org/metadata/how-to-use-the-api</a> )<br>File QC Report service<br>( <a href="https://ega-archive.org/about/quality-control-reports">https://ega-archive.org/about/quality-control-reports</a> )<br>Beacon ( <a href="https://ega-archive.org/beacon#!/">https://ega-archive.org/beacon#!/</a> )                                                                                                                                                                                                                                                   | Searching public EGA metadata by keywords and accessions; Discovering data that contains genomic and phenotypic and clinical information of interest |
| Data access     | EGA Website<br>( <a href="https://ega-archive.org/access/data-access">https://ega-archive.org/access/data-access</a> )<br>pyega3<br>( <a href="https://github.com/EGA-archive/ega-download-client">https://github.com/EGA-archive/ega-download-client</a> )<br>FUSE ( <a href="https://github.com/EGA-archive/ega-fuse-client">https://github.com/EGA-archive/ega-fuse-client</a> )<br>Permissions API<br>( <a href="https://permissions.ega-archive.org/api/spec#/">https://permissions.ega-archive.org/api/spec#/</a> &<br><a href="https://ega.ebi.ac.uk:8443/ega-permissions/swagger-ui/index.html#/">https://ega.ebi.ac.uk:8443/ega-permissions/swagger-ui/index.html#/</a> )                                                                              | Requesting and downloading data and metadata deposited at the EGA; Managing data access permission                                                   |
| User support    | Submission support<br>( <a href="https://ega-archive.org/submission/FAQ">https://ega-archive.org/submission/FAQ</a> )<br>Access support ( <a href="https://ega-archive.org/access/faq">https://ega-archive.org/access/faq</a> )<br>EGA Helpdesk ( <a href="mailto:helpdesk@ega-archive.org">helpdesk@ega-archive.org</a> )<br>EGA Quick Tour<br>( <a href="https://www.ebi.ac.uk/training/online/courses/ega-quick-tour/">https://www.ebi.ac.uk/training/online/courses/ega-quick-tour/</a> )<br>Introduction to exploring the EGA<br>( <a href="https://embl-ebi.cloud.panopto.eu/Panopto/Pages/Viewer.aspx?id=5e17012d-ff9f-482c-846c-ace701330301">https://embl-ebi.cloud.panopto.eu/Panopto/Pages/Viewer.aspx?id=5e17012d-ff9f-482c-846c-ace701330301</a> ) | Assisting requesters, submitters, and DAC members navigate and participate in the data cycle (data upload, discovery, access, and download)          |
